# Supplementary material for: Effect of Risk-Stratified Care on Disability Among Adults With Low Back Pain Treated in the Military Health System: A Randomized Clinical Trial
Source: PubMed Central journal article supplement (PMC10326636; doi:10.1001/jamanetworkopen.2023.21929), 2023-07-06
Supplement: jamanetwopen-e2321929-s003.pdf [file jamanetwopen-e2321929-s003.pdf]

## Data Sharing Statement

Rhon. Effect of Risk-Stratified Care on Disability Among Adults With Low Back Pain Being Treated in the Military Health System. *JAMA Netw Open*. Published July 06, 2023. doi:10.1001/jamanetworkopen.2023.21929

### Data

**Data available:** Yes

**Data types:** Deidentified participant data, Data dictionary

**How to access data:** Data will be shared upon reasonable request and after applicable Data Sharing Agreements are approved through the Defense Health Agency (found at [www.health.mil](http://www.health.mil))

**When available:** With publication

### Supporting Documents

**Document types:** None

### Additional Information

**Who can access the data:** Data will be shared upon reasonable request and after applicable Data Sharing Agreements are approved through the Defense Health Agency (found at [www.health.mil](http://www.health.mil))

**Types of analyses:** For the purposes specified when submitting a reasonable request.

**Mechanisms of data availability:** Data will be made available with investigator support, proper plan for the data, and after applicable Data Sharing Agreements are approved through the Defense Health Agency (found at [www.health.mil](http://www.health.mil))
